# Supplementary material
Source: PubMed Central journal article supplement (PMC9464703)
Supplement: NIHMS1821120-supplement-3.pdf [file NIHMS1821120-supplement-3.pdf]

## 10. Supplemental Information

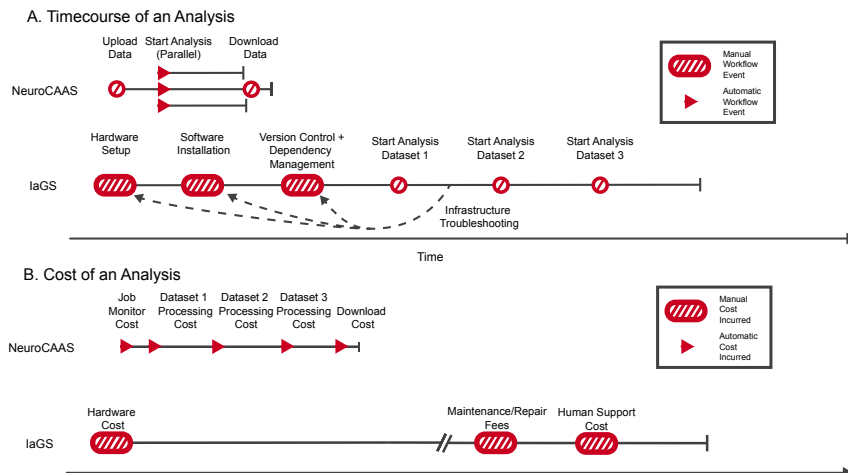

Figure S1: **Infrastructure-as-Grad-Student vs Infrastructure-as-Code.**, Related to Figure 2. A. Local processing via IaGS requires a number of time-consuming steps from the user (hardware setup, software installation and maintenance, etc.) before any analyses are run. Then typically analyses of large datasets are run serially (due to resource constraints), leading to longer processing times. Troubleshooting related to misconfiguration of infrastructure can cause massive delays. On NEUROCAAS, user interaction is only required at the beginning of the analysis (to upload the data), then NEUROCAAS processes the data using large-scale parallel compute resources, leading to faster overall processing times. User storage contains separated input and output areas where users can maintain datasets for re-analysis, or keep intermediate analysis results as convenient for subsequent jobs. From data in user storage, users can analyze multiple datasets in parallel. While errors may occur, users can delegate debugging to developers, as issues are guaranteed not to be due to infrastructure configuration. B. On NEUROCAAS, some costs are incurred with each analysis run: the user must upload the datasets (incurring a small job monitor cost), and then each dataset incurs some compute cost. The cost of using these analyses is directly proportional to analysis duration and the type of cloud resources used to construct the relevant infrastructure stack (see Table S7). For local processing, the bulk of the costs are paid upfront, in purchasing hardware; then additional labor costs are incurred for maintenance, support, and usage of limited local resources. If the per-dataset costs are low and the total number of datasets to be processed is limited then NEUROCAAS can lead to significantly smaller total costs than local processing \$2.6

---

```

{
  "PipelineName":"ncapexamplepipeline",
  "REGION":"region of service for users",
  "Lambda":{
    "CodeUri":"Codebase for \ncap Compute",
    "Handler":"Module for \ncap Compute",
    "Launch":"Whether or not to launch new pipelines. ",
    "LambdaConfig":{
      "AMI":"AMI id of the developer-configured instance",
      "INSTANCE_TYPE": "virtualized hardware instance id. ",
      "REGION": "us-east-1",
      "SECURITY_GROUPS":"network configuration",
      "IAM_ROLE":"permissions to launch new immutable analysis
        environments",
      "KEY_NAME":"permissions to access immutable analysis
        environments",
      "WORKING_DIRECTORY":"immutable analysis environment code",
      "COMMAND":"code to run to initiate processing",
      "SHUTDOWN_BEHAVIOR":"destroy immutable analysis environment
        after processing terminates",
      "CONFIG":"location of additional configuration parameters",
      "MISSING_CONFIG_ERROR":"We need a config file to analyze
        data.",
      "EXECUTION_TIMEOUT":"Additional parameters for \ncap Compute",
      "SSM_TIMEOUT":"Additional parameters for \ncap Compute",
      "LOGDIR":"Parameters for \ncap interface",
      "OUTDIR":"Parameters for \ncap interface",
      "INDIR":"Parameters for \ncap interface",
      "LAUNCH":"Launching new pipelines",
      "LOGFILE":"Logging location for diagnostic information",
      "DEPLOY_LIMIT":"Maximum number of concurrent instances to
        deploy",
      "MONITOR":"Enable or disable detailed monitoring"
    }
  },
  "UXData":{
    "Affiliates":[
      {
        "AffiliateName":"examplegroup1",
        "UserNames":["ian","shreya","taiga"],
        "UserInput":true,
        "ContactEmail":"The email we should notify regarding
          processing status."
      },
      {
        "AffiliateName":"examplegroup2",
        "UserNames":["liam","john"],
        "UserInput":true,
        "ContactEmail":"The email we should notify regarding
          processing status."
      }
    ]
  }
}

```

58

---

Figure S2: **NeuroCAAS blueprint template declaring all relevant resources.** Related to STAR methods. Immutable Analysis Environments can be defined from Variables in the Lambda.LambdaConfig field, the job manager protocol is defined in Lambda.CodeUri and Lambda.Handler. Users and permissions are defined in UXData.

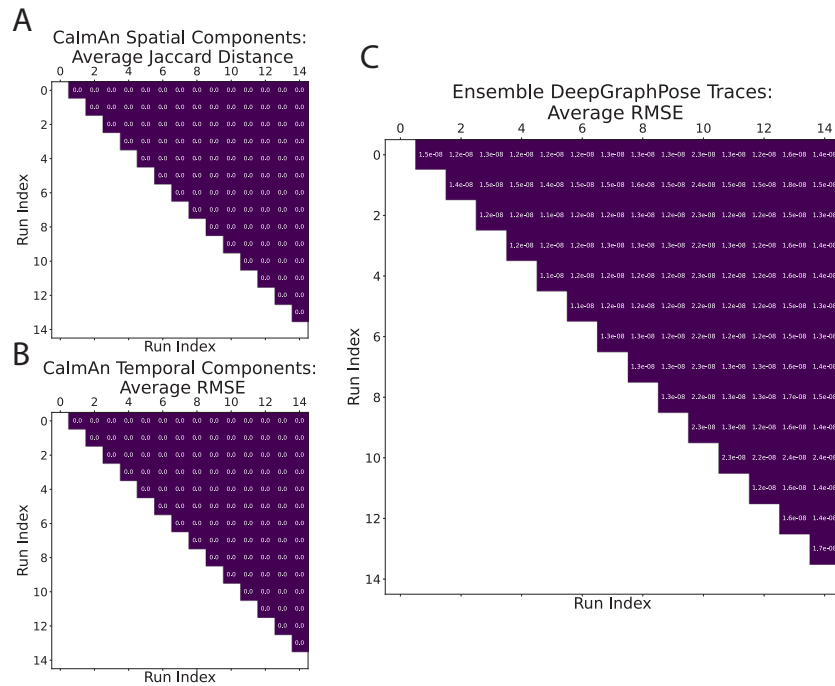

Figure S3: **Analyses on NeuroCAAS are reproducible.** Related to Table 1. Figure shows fifteen independent runs of two analysis algorithms- CalmAn on the left, and Ensemble DeepGraphPose on the right, run from different geographic locations and versions of the NeuroCAAS platform. The first five runs were performed by an author in the United States. The second five runs were performed by an independent researcher in India. The following four were performed by an independent researcher in Switzerland, and the last was run on a totally independent version of the NeuroCAAS platform. Each independent run uses the same data and configuration files, and assumes that all data is already uploaded to NeuroCAAS. Images show differences in the actual analysis outputs between runs. For CalmAn, we quantify the Jaccard Distance between detected spatial components (A), and the Average RMSE between detected temporal components (B). Analysis results are identical across all runs. For Ensemble DGP, we quantify the Average RMSE between body part traces produced by the same network (C). The average RMSE never exceeds order  $1e-7$ . Given that these traces are given in units of pixels, these differences are negligible.

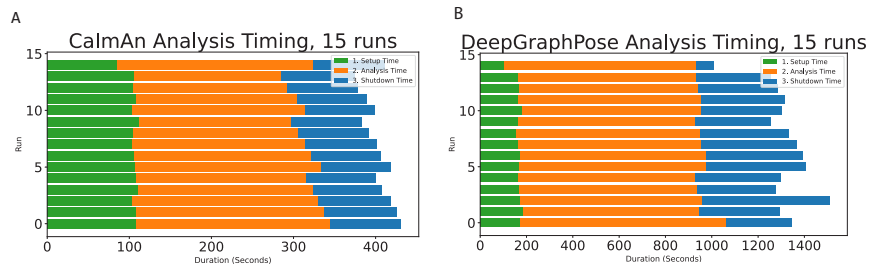

Figure S4: **Analyses on NeuroCAAS are reproducible.** Related to Table 1. Figure shows same fifteen independent runs of two analysis algorithms as in Figure S3. Images show the time taken to complete different parts of the analysis- in green is the time taken to set up analysis infrastructure after a request. In orange, we show the time between the successful setup of analysis infrastructure, and the production of the analysis's final output. In blue, we show the time required to take apart infrastructure after analysis is complete. Overall, across different runs differences in runs are small. These results emphasize the difference between our platform and others which offer public compute via cluster resources, where wait times in queues would affect such quantifications.

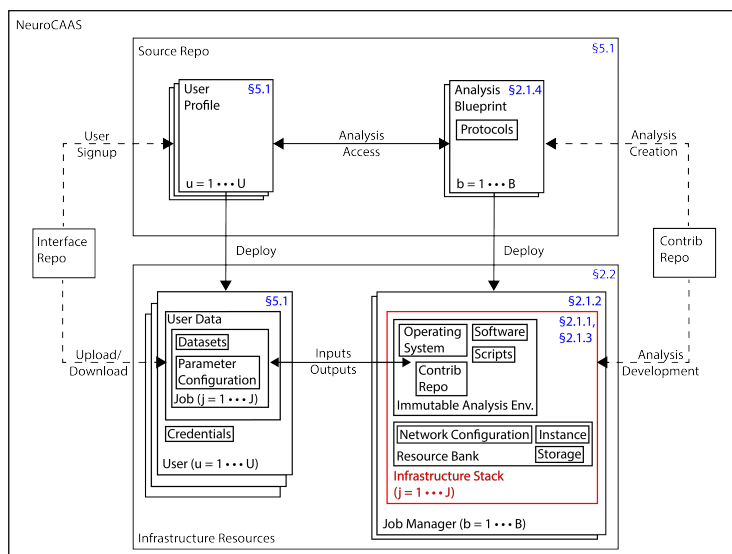

Figure S5: **NeuroCAAS Design Diagram.** Related to STAR Methods. NEUROCAAS is built with an Infrastructure-as-Code design, meaning that we first write a *source repo* (top) specifying all of the actual resources we will use to carry out data processing (bottom). The source repo (top) contains three main types of code: User Profiles, specifying relevant user data; Analysis Blueprints, describing individual analyses on NEUROCAAS, and Protocols, giving rules that describe NEUROCAAS job manager function. Each user and each analysis in NEUROCAAS has a dedicated code document, as specified by indices ( $u, b$ ). All parts of the source repo can independently be *deployed*, automatically provisioning and configuring the infrastructure resources specified therein. Deployment comprehensively generates the resources necessary to run analyses on NEUROCAAS. Notably, most parts of infrastructure stacks (bottom right) are not persistent, but rather are instantiated every time users request an analysis job, specified as a combination of datasets and parameter configurations (bottom left). Job managers deploy one set of infrastructure for each dataset in a requested job, as specified by the index  $j$ . The contrib and interface repo assist in the deployment of resources from the source repo, and in the management of resulting resources. New users were registered by filling in a corresponding user profile with code from the interface repo, which was then deployed with the source repo to automatically generate storage space, dedicated login credentials, and permissions to use analyses for the user. The user profile is similar in format to the UXData segment of the blueprint as given in Figure S2, and can be found in the NEUROCAAS codebase online. Section numbers refer to relevant parts of the main text.

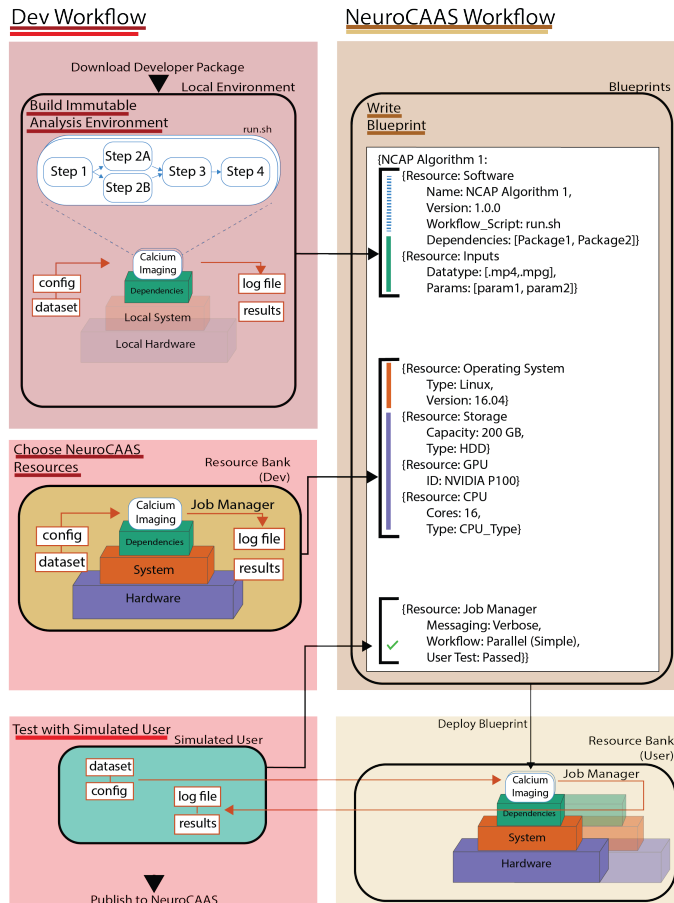

Figure S6: **Overview of NeuroCAAS Developer Workflow.** Related to STAR Methods. Left indicates the developer’s experience; right indicates the work that NEUROCAAS performs. The developer begins by downloading the developer package [https://github.com/cunningham-lab/neurocaas\\_contrib](https://github.com/cunningham-lab/neurocaas_contrib) and building an immutable analysis environment script on their local machine. After determining workflow and optionally installing analysis software into an IAE, the developer locally tests that sample data and config files yield expected logs and results. Once satisfied, the developer updates a blueprint with IAE specifications. Next, developers configure system and hardware settings by setting up their IAE, complete with sample data and parameters, on hardware from the NEUROCAAS resource bank. Configuration and updates to an IAE are done identically to initial local build, allowing for IAEs custom-built for powerful cloud resources. Finally, developers simulate NEUROCAAS user accounts and trigger analyses with their blueprint to ensure that their analysis functions as intended end-to-end before publishing their blueprint for use.

### A. Local Cost Crossover (Cluster)

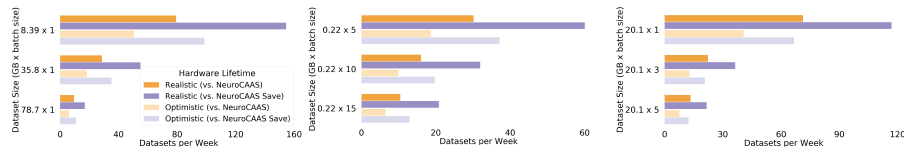

### B. Local Utilization Crossover (Cluster)

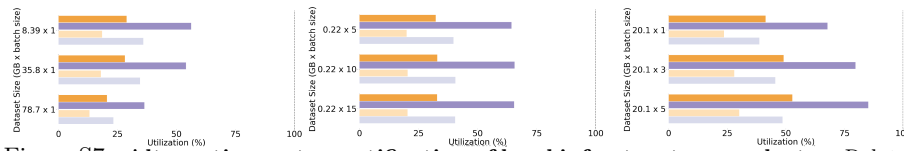

Figure S7: **Alternative cost quantification of local infrastructure as cluster.** Related to Figure 7. Because the instances offered on AWS are not wholly analogous to either personal hardware or cluster resources, we offer additional comparisons that span the range of prices. Cluster pricing was calculated with the AWS TCO calculator <https://calculator.aws/>. We calculated the cost of infrastructure as a subset of the TCO provided by AWS. In particular, we calculated  $x_{local}$  as the total server hardware cost (undiscounted) and acquisition cost of NAS storage, and the cost of a GPU, with additional yearly recurring costs  $c_s(n)$  given by storage administration cost, server hardware maintenance cost, and IT Labor costs. We then calculated the LCC and LUC from these quantities as described in §2.6.9.3. A) provides Local Cost Crossover for these resources priced as cluster compute resources, priced according to Amazon AWS’s TCO calculator. B) provides the same for Local Utilization.

| Algorithm Name        | Publication             | Calcium Imaging  |                 |           |                 |                 |         |        |     |     |
|-----------------------|-------------------------|------------------|-----------------|-----------|-----------------|-----------------|---------|--------|-----|-----|
|                       |                         | Software Version | Package Version | OS config | Batch Scripting | Other Processes | Storage | Memory | GPU | CPU |
| CaInAn                | Giovannucci et al. 2017 | ✓                | ✓               | X         | ✓               | X               | X       | X      | X   | X   |
| CNMF-E                | Zhou et al. 2018        | ✓                | ✓               | X         | X               | X               | X       | X      | X   | X   |
| Suite2p               | Pachitariu et al. 2017  | ✓                | ✓               | X         | ✓               | X               | X       | X      | X   | X   |
| ABLE                  | Reynolds et al. 2017    | ✓                | ✓               | X         | ✓               | X               | X       | X      | X   | X   |
| SCALPEL               | Petersen et al. 2018    | ✓                | ✓               | X         | X               | X               | X       | X      | X   | X   |
| MiniPIPE              | Lu et al. 2018          | ✓                | ✓               | X         | ✓               | X               | X       | X      | X   | X   |
| SamuROI               | Rueckl et al. 2017      | ✓                | X               | X         | X               | X               | X       | X      | X   | X   |
| Romano                | Romano et al. 2017      | ✓                | ✓               | X         | X               | X               | X       | X      | X   | X   |
| FISSA                 | Keemink et al. 2018     | ✓                | ✓               | X         | ✓               | X               | X       | X      | X   | X   |
| OASIS                 | Friedrich et al. 2017   | ✓                | ✓               | X         | X               | X               | X       | X      | X   | X   |
| Percentage Supporting |                         | 100%             | 90%             | 0%        | 50%             | 0%              | 0%      | 0%     | 0%  | 0%  |

Table S1: **Infrastructure support for Calcium Imaging Algorithms.** Related to Figure 1. See STAR methods, 9.3 for details on evaluation.



| Algorithm Name        | Publication             | Behavioral Quantification. |                 |           |                 |                 |         |        |     |     |
|-----------------------|-------------------------|----------------------------|-----------------|-----------|-----------------|-----------------|---------|--------|-----|-----|
|                       |                         | Software Version           | Package Version | OS config | Batch Scripting | Other Processes | Storage | Memory | GPU | CPU |
| DeepLabCut            | Mathis et al. 2018      | ✓                          | ✓               | ✓         | X               | X               | X       | X      | X   | X   |
| DeepFly3D             | Günzel et al. 2019      | ✓                          | ✓               | X         | X               | X               | X       | X      | X   | X   |
| JAABA                 | Kabra et al. 2012       | ✓                          | ✓               | X         | X               | X               | X       | X      | X   | X   |
| Ctrax                 | Branson et al. 2009     | ✓                          | ✓               | X         | ✓               | X               | X       | X      | X   | X   |
| DeepPoseKit           | Graving et al. 2019     | ✓                          | X               | X         | X               | X               | X       | X      | X   | X   |
| Ethovision            | —                       | ✓                          | ✓               | X         | X               | X               | X       | X      | X   | X   |
| APT                   | —                       | ✓                          | ✓               | ✓         | X               | X               | X       | X      | X   | X   |
| bonsai                | Lopes et al. 2015       | X                          | ✓               | X         | X               | X               | X       | X      | X   | X   |
| Miceprofiler          | de Chaumont et al. 2012 | ✓                          | ✓               | X         | X               | X               | X       | X      | X   | X   |
| LEAP                  | Pereira et al. 2018     | ✓                          | ✓               | X         | X               | X               | X       | X      | X   | X   |
| Percentage Supporting |                         | 90%                        | 90%             | 20%       | 10%             | 0%              | 0%      | 0%     | 0%  | 0%  |

Table S2: **Infrastructure support for Behavioral Quantification Algorithms.** Related to Figure 1. See STAR methods, 9.3 for details on evaluation.

| NEUROCAAS IAEs                                           |                                              |                                        |                                                                                                                                                                                   |
|----------------------------------------------------------|----------------------------------------------|----------------------------------------|-----------------------------------------------------------------------------------------------------------------------------------------------------------------------------------|
| Analysis Name                                            | Paper                                        | Subfield                               | Description                                                                                                                                                                       |
| DeepLabCut (dev, public, 2.X)                            | (Mathis et al., 2018)                        | Pose Tracking                          | Markerless pose estimation of user-defined features with deep learning for all animals, including humans.                                                                         |
| DeepGraphPose                                            | (Wu et al., 2020)                            | Pose Tracking                          | DGP is a semi supervised model which can run on top of other tracking algorithms, such as DLC.                                                                                    |
| Ensemble DGP                                             | N/A                                          | Pose Tracking                          | Ensemble DGP independently trains N different DeepGraphPose models that differ only in the sequence of minibatches that they see, and generates a consensus prediction from them. |
| DLC Tracking (Polleux)                                   | N/A                                          | Pose Tracking                          | (Custom) Markerless pose estimation with post-processing to quantify freezing behavior.                                                                                           |
| DLC Tracking (Carcea)                                    | N/A                                          | Pose Tracking                          | (Custom) Markerless pose estimation with post-processing to quantify social behavior.                                                                                             |
| Labeling GUI                                             | N/A                                          | Pose Tracking                          | Labeling GUI for a variety of pose tracking algorithms.                                                                                                                           |
| BehaveNet / Partitioned-subspace VAE                     | (Batty et al., 2019) (Whiteway et al., 2021) | Behavioral Video Analysis              | Nonlinear embedding and Bayesian neural decoding of behavioral videos.                                                                                                            |
| CalmAn (dev, public)                                     | (Giovannucci et al., 2019)                   | Calcium Imaging                        | Integrated python toolbox for large scale Calcium Imaging data Analysis and behavioral analysis.                                                                                  |
| LocaNMF                                                  | (Saxena et al., 2020)                        | Widefield Imaging                      | Region-based Decomposition for Widefield Calcium Imaging Data.                                                                                                                    |
| PMD                                                      | (Buchanan et al., 2018)                      | Functional Imaging                     | Penalized Matrix Decomposition for Denoising and Compression of Functional Imaging Data.                                                                                          |
| WFCI Pipeline                                            | (Couto et al., 2021)                         | Widefield Imaging                      | Full data pipeline to work with widefield imaging data equipped with GUI                                                                                                          |
| 1-photon compression                                     | N/A                                          | Functional Imaging                     | GUI based compression of imaging data.                                                                                                                                            |
| 1-photon motion correction                               | N/A                                          | Functional Imaging                     | GUI based motion correction of imaging data.                                                                                                                                      |
| 1-photon demixing                                        | N/A                                          | Functional Imaging                     | GUI based demixing of imaging data.                                                                                                                                               |
| BarDensr                                                 | (Chen et al., 2020)                          | Spatial Transcriptional Imaging        | BarDensr (BARcode DEMixing through Non-negative Spatial Regression) for demixing spatial transcriptomic imaging data.                                                             |
| YASS                                                     | (Lee et al., 2017)                           | Spike Sorting                          | YASS is a spike sorting pipeline developed for high-firing rate, high-collision rate retinal recordings.                                                                          |
| Latent Factor Analysis for Dynamical Systems: LFADS      | (Sussillo et al., 2016)                      | Probabilistic Inference on Time Series | Deep learning method to infer latent dynamics from single-trial neural spiking data.                                                                                              |
| Kalman Filter/Smother-Linear Dynamical System Inference. | (Minka, 1999)                                | Probabilistic Inference on Time Series | Time-invariant model for tracking a single object in a continuous state space.                                                                                                    |
| Emergent Property Inference                              | (Bittner et al., 2019)                       | Likelihood Free Inference              | A method for learning parameter distributions on models constrained to produce certain desirable phenomena in their output.                                                       |

Table S3: **List of existing analyses currently implemented on NeuroCAAS through IAEs.** Related to Figure 2. Parentheses indicate different individual IAEs for a single analysis, corresponding to analysis versions or development stages.

| Dataset Details |             |                           |                                                    |                            |                                                                                                                                                    |                            |                                                                                                                                                                                                                                                    |
|-----------------|-------------|---------------------------|----------------------------------------------------|----------------------------|----------------------------------------------------------------------------------------------------------------------------------------------------|----------------------------|----------------------------------------------------------------------------------------------------------------------------------------------------------------------------------------------------------------------------------------------------|
| Analysis        | Format      | Size (Small)              | Dim (Small)                                        | Size (Medium)              | Dim (Medium)                                                                                                                                       | Size (Large)               | Dim (Large)                                                                                                                                                                                                                                        |
| CaImAn          | zipped tiff | 8.39GB                    | $8000 \times 512 \times 512^1$                     | 35.84GB                    | $41000 \times 458 \times 477^1$                                                                                                                    | 78.70GB                    | $90000 \times 463 \times 472^2$                                                                                                                                                                                                                    |
| DeepLabCut      | mpeg        | $5 \times 214.8\text{MB}$ | $5 \times 36000 \times 340 \times 420^3$           | $10 \times 214.8\text{MB}$ | $10 \times 36000 \times 340 \times 420^3$                                                                                                          | $15 \times 214.8\text{MB}$ | $15 \times 36000 \times 340 \times 420^3$                                                                                                                                                                                                          |
| PMD + LocaNMF   | numpy array | $1 \times 20.1\text{GB}$  | $[500 \times 600 \times 1697, 1697 \times 8979]^4$ | $3 \times 20.1\text{GB}$   | $[500 \times 600 \times 1697, 1697 \times 8979]; [500 \times 600 \times 1652, 1652 \times 9000]; [500 \times 600 \times 2298, 2298 \times 8988]^4$ | $5 \times 20.1\text{GB}$   | $[500 \times 600 \times 1697, 1697 \times 8979]; [500 \times 600 \times 1652, 1652 \times 9000]; [500 \times 600 \times 2298, 2298 \times 8988]; [500 \times 600 \times 2304, 2304 \times 8992]; [500 \times 600 \times 1910, 1910 \times 8952]^4$ |

1 [Time  $\times$  X  $\times$  Y] at 7 hz [Giovannucci et al. \(2019\)](#)

2 [Time  $\times$  X  $\times$  Y] at 30 hz [Giovannucci et al. \(2019\)](#)

3 [Batch  $\times$  Time  $\times$  X  $\times$  Y] at 30 hz

4 [X  $\times$  Y  $\times$  Rank, Rank  $\times$  Time] at 30 Hz

Table S4: **Details of the datasets used to benchmark performance.** Related to Figure 7. Sizes given for the three datasets tested for each pipeline shown. Dataset dimension labels are included in footnotes provided.

| NEUROCAAS Benchmarked Analyses |            |        |                   |                      |                          |             |                 |                 |                        |
|--------------------------------|------------|--------|-------------------|----------------------|--------------------------|-------------|-----------------|-----------------|------------------------|
| Analysis Name                  | Storage    | Memory | GPU               | CPU count            | OS                       | Job Monitor | Resource Usage  | Version Control | Packages               |
| CalmAn                         | 500 GB SSD | 275 GB | N/A               | 64 vCPU <sup>1</sup> | Ubuntu 16.04 (Linux HVM) | stdout      | CPU Utilization | Github          | pip requirements file  |
| DeepLabCut                     | 200 GB SSD | 65 GB  | Nvidia Tesla K80  | 4 vCPU <sup>2</sup>  | Ubuntu 16.04 (Linux HVM) | stdout      | CPU Utilization | Github          | conda environment file |
| PMD                            | 75 GB SSD  | 275 GB | N/A               | 64 vCPU <sup>1</sup> | Ubuntu 18.04 (Linux HVM) | stdout      | CPU Utilization | Github          | Conda Package          |
| LocaNMF                        | 75 GB SSD  | 65 GB  | Nvidia Tesla V100 | 8 vCPU <sup>3</sup>  | Ubuntu 16.04 (Linux HVM) | stdout      | CPU Utilization | Github          | Conda Package          |

<sup>1</sup> Intel Xeon Platinum 8000 series (Skylake-SP)

<sup>2</sup> Intel Broadwell (AWS)

<sup>3</sup> Intel Xeon E5-2686v4

Table S5: **Infrastructure details for benchmarked algorithms.** Related to Figure 7. Job Monitor refers to the mechanisms used to track the status of ongoing jobs. Resource Usage refers to the hardware diagnostics tracked by NeuroCAAS. Version Control refers to the version control mechanisms used to maintain fidelity of core analysis code. Packages refers to the mechanisms used to handle analysis dependencies.

| NEUROCAAS Local Simulation |            |        |                  |                      |                          |             |                |                 |                       |
|----------------------------|------------|--------|------------------|----------------------|--------------------------|-------------|----------------|-----------------|-----------------------|
| Analysis Name              | Storage    | Memory | GPU              | CPU count            | OS                       | Job Monitor | Resource Usage | Version Control | Packages              |
| CalmAn                     | 500 GB SSD | 17 GB  | N/A              | 4 vCPU <sup>1</sup>  | Ubuntu 16.04 (Linux HVM) | stdout      | None           | github          | Pip requirements file |
| DeepLabCut                 | 200 GB SSD | 65 GB  | Nvidia Tesla K80 | 4 vCPU <sup>2</sup>  | Ubuntu 16.04 (Linux HVM) | stdout      | None           | github          | Conda Package         |
| PMD                        | 75 GB SSD  | 131 GB | N/A              | 16 vCPU <sup>3</sup> | Ubuntu 18.04 (Linux HVM) | stdout      | None           | Github          | Conda Package         |
| LocaNMF                    | 75 GB SSD  | 65 GB  | Nvidia Tesla K80 | 4 vCPU <sup>2</sup>  | Ubuntu 16.04 (Linux HVM) | stdout      | None           | github          | Conda Package         |

<sup>1</sup> [AMD EPYC 7000 Series](#)

<sup>2</sup> [Intel Broadwell \(AWS\)](#)

<sup>3</sup> [Intel Xeon E5 Broadwell Processors](#)

Table S6: **Details of infrastructure used to simulate local processing.** Related to Figure 7. The column labels mirror those in Table S5.

| Pricing List                        |                         |                                       |
|-------------------------------------|-------------------------|---------------------------------------|
| Resource                            | Metrics                 | Rate                                  |
| EC2 (Compute)                       | Time                    | Hardware Dependent, Fluctuates        |
| Lambda (Workflow) <sup>1</sup>      | Data Size $\times$ Time | $\$1.66667 \times 1e-5$ per GB-second |
| S3 (Data Transfer Out) <sup>2</sup> | Data Size               | $\$0.09$ per GB                       |

<sup>1</sup> AWS Lambda is also priced for number of requests, but this is a negligible cost for a single analysis run.

<sup>2</sup> Data Transfer is only priced out of Amazon Web Services, i.e. in returning results to the end user.

Table S7: **Pricing details for implemented algorithms.** Related to Figure 7. The virtualized hardware underlying a hardware instance can be provisioned at several different prices. We used AWS EC2 Spot Instance pricing to reduce costs, having known beforehand how long the analyses would take. At the moment, we depict prices based on spot instance availability in September 2019. Empirically, we observe that spot instance price fluctuations give standard deviations on the order of cents over a period of months (see source repo for experiments). The duration of NEUROCAAS Compute and Local analysis time was recorded automatically with cloud native resource monitoring tools (AWS Lambda, AWS Cloudwatch Events, and AWS S3). These tools automatically recorded the creation and destruction of instances, and recorded the relevant timestamps at millisecond resolution. These monitoring tools were also managed via NEUROCAAS blueprints, and their design can be found in the same blueprint codebase. The same tools were used to calculate the usage data shown in Figure 3. We do not disclose user data at an individual level, but developers can generate the same figures for users of their own analysis by using the NEUROCAAS contrib repo (specific instructions are given in the source repo’s README file).

| Cost (Local)               |            |           |         |                  |                                                          |                                                                                 |
|----------------------------|------------|-----------|---------|------------------|----------------------------------------------------------|---------------------------------------------------------------------------------|
| Algorithm Name             | vCPU count | GPU       | Memory  | Storage Capacity | Workstation Price, US Dollars (Estimated Price Tag Cost) | Cluster Price, US Dollars (Estimated Price Tag Cost from Amazon TCO Calculator) |
| CaImAn                     | 4          | N/A       | 16 GiB  | 500 GB           | 1618 <sup>2</sup>                                        | 1499+1000                                                                       |
| DeepLabCut                 | 4          | Tesla K80 | 61GiB   | 200 GB           | 3120 <sup>3</sup>                                        | 1701+400+1555 <sup>5</sup>                                                      |
| PMD + LocaNMF <sup>1</sup> | 16         | Tesla K80 | 122 GiB | 150 GB           | 5436 <sup>4</sup>                                        | 10836+300+1555 <sup>5</sup>                                                     |

<sup>1</sup> Hardware cost for a local instance that can account for processing done on all analyses.

<sup>2</sup> [CaImAn Hardware Price](#)

<sup>3</sup> [DeepLabCut Hardware Price](#)

<sup>4</sup> [PMD+LocaNMF cost](#)

<sup>5</sup> [Cluster Price](#)

Table S8: **Instance and hardware cost details for local cost comparisons.** Related to Figure 7. Estimated Price tag prices as of May 3rd, 2020. Price tag estimation of workstation style hardware was based on market prices chosen to reflect the infrastructure implementation as given in Table S6, in particular, CPU make. Estimation of cluster style hardware cost was based on the AWS TCO calculator (<https://awstccalculator.com>), as of January 25th, 2020, incorporating the total server hardware cost (undiscounted) and acquisition cost of SAN storage.
